# Supplementary material for: A non-enzymatic electrochemical sensor based on nitrogen-doped mesoporous carbon@hydroxyl-functionalized ionic liquid composites modified electrode for the detection of fenitrothion
Source: Royal Society of Chemistry journal article supplement (doi:10.1039/d3ra01011b), 2023-01-01
Supplement: d3ra01011b1.pdf [file d3ra01011b1.pdf]

1                                    **Electronic Supplementary Material**

2            A non-enzymatic electrochemical sensor based on nitrogen-doped  
3    mesoporous carbon@hydroxyl-functionalized ionic liquid composites  
4                                    modified electrode for the detection of fenitrothion

5

6    Xinsheng Liu<sup>a</sup>, Yutong Li<sup>b</sup>, Wenli Qiao<sup>b</sup>, Mengjun Chang<sup>b</sup>, Yonghong Li<sup>b,c,\*</sup>

7    *<sup>a</sup>School of Basic Medical Sciences, Ningxia Medical University, Yinchuan 750004, P.R.*  
8    *China*

9    *<sup>b</sup>School of Public Health, Ningxia Medical University, Yinchuan 750004, P.R. China*

10   *<sup>c</sup>Key Laboratory of Environmental Factors and Chronic Disease Control, Yinchuan*  
11   *750004, P.R. China*

12

13

---

\*Corresponding Author, Tel: +86-951-6980139; Fax: +86-951-6980139.

E-mail: yonghongli2012@163.com (Y. Li).

## 1 Results and discussion

2

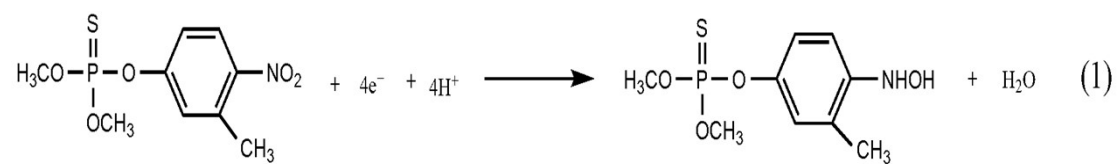

3

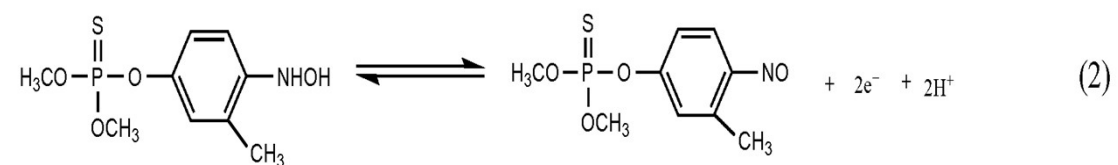

4 Scheme S1 The possible reaction mechanism of FNT on N-CMK-3@IL/GCE.

5

1 Table S1 The effects of potential interfering substances on the response of FNT ( $C_{\text{FNT}} =$   
 2  $20.0 \mu\text{g L}^{-1}$ )

| Interfering substance | Concentration / $\text{mg L}^{-1}$ | Signal changes |
|-----------------------|------------------------------------|----------------|
| $\text{K}^+$          | 20.0                               | -0.06          |
| $\text{Ca}^{2+}$      | 20.0                               | -0.03          |
| $\text{Cd}^{2+}$      | 20.0                               | +0.01          |
| $\text{Fe}^{2+}$      | 20.0                               | +0.03          |
| $\text{Zn}^{2+}$      | 20.0                               | +0.02          |
| $\text{Cl}^-$         | 20.0                               | -0.03          |
| $\text{NO}_3^-$       | 20.0                               | +0.01          |
| $\text{SO}_4^{2-}$    | 20.0                               | +0.03          |
| DA                    | 2                                  | -0.01          |
| AA                    | 2                                  | +0.06          |
| UA                    | 2                                  | -0.01          |
| glucose               | 2                                  | -0.01          |
| P-nitrophenol         | 0.2                                | -0.05          |
| nitrobenzene          | 0.2                                | +0.01          |

3  
 4  
 5

1

Table S2 The Rct values of different electrodes

| Electrode            | GCE | IL/GCE | N-CMK-3@IL/GCE |
|----------------------|-----|--------|----------------|
| Rct value / $\Omega$ | 626 | 107    | 36             |

2

3

1

Table S3 Effect of IL concentration in composites on the current signal of FNT.

| IL / %      | 1.0    | 3.0    | 5.0    | 7.0    | 10.0   |
|-------------|--------|--------|--------|--------|--------|
| I / $\mu$ A | 1.0257 | 1.3740 | 2.0223 | 1.3520 | 1.3000 |

2

3

1 Table S4 Effect of N-CMK-3 content in composites on the current signal of FNT.

| N-CMK-3<br>/ mg mL <sup>-1</sup> | 0.3    | 0.5    | 1.0    | 1.3    | 1.5    |
|----------------------------------|--------|--------|--------|--------|--------|
| I / $\mu$ A                      | 1.5823 | 1.7197 | 1.9430 | 1.4137 | 1.3627 |

2

3

1

Table S5 Effect of the accumulation potential on the current signal of FNT.

| Accumulation potential / V | -0.7   | -0.6   | -0.5   | -0.4   | -0.3   | OCP    |
|----------------------------|--------|--------|--------|--------|--------|--------|
| I / $\mu\text{A}$          | 1.6830 | 1.6070 | 1.7220 | 1.6410 | 1.5950 | 1.8660 |

2

3

1

Table S6 Effect of the accumulation time on the current signal of FNT.

| Accumulation<br>time / s | 10     | 30     | 60     | 90     | 120    |
|--------------------------|--------|--------|--------|--------|--------|
| I / $\mu\text{A}$        | 1.7690 | 1.8550 | 1.9910 | 1.9290 | 1.8850 |

2

3



1

Table S7 Reproducibility and stability

| electrode         | 1     | 2     | 3     | 4     | 5     | 6     |
|-------------------|-------|-------|-------|-------|-------|-------|
| I / $\mu\text{A}$ | 1.946 | 1.910 | 1.973 | 1.956 | 1.940 | 1.960 |

2

3

1

Table S8 Determination of FNT on N-CMK-3@IL/GCE in vegetable samples

| samples | I1 / $\mu\text{A}$ | I2 / $\mu\text{A}$ | I3 / $\mu\text{A}$ |
|---------|--------------------|--------------------|--------------------|
| Cabbage | 0.9305             | 0.8944             | 0.9088             |
| Lettuce | 0.9061             | 0.9094             | 0.9463             |
| Greens  | 0.9046             | 0.9018             | 0.9168             |

2

3

4
